# Supplementary material for: Trans-Anethole Alleviates Subclinical Necro-Haemorrhagic Enteritis-Induced Intestinal Barrier Dysfunction and Intestinal Inflammation in Broilers
Source: Front Microbiol. 2022 Mar 21;13:831882. doi: 10.3389/fmicb.2022.831882 (PMC8977854; doi:10.3389/fmicb.2022.831882)
Supplement: Supplementary file 12 [file Data_Sheet_7.ZIP]

Archive with 39 entries (36 files):
- NE group-Ileal TUNEL apoptosis/
- NE group-Ileal TUNEL apoptosis/200 x/
- NE group-Ileal TUNEL apoptosis/200 x/NE-1  200-1.jpg
- NE group-Ileal TUNEL apoptosis/200 x/NE-1  200-2.jpg
- NE group-Ileal TUNEL apoptosis/200 x/NE-1  200-3.jpg
- NE group-Ileal TUNEL apoptosis/200 x/NE-1  200-5 6.jpg
- NE group-Ileal TUNEL apoptosis/200 x/NE-1  200-5.jpg
- NE group-Ileal TUNEL apoptosis/200 x/NE-1  200-6.jpg
- NE group-Ileal TUNEL apoptosis/200 x/NE-1 200-1 2.jpg
- NE group-Ileal TUNEL apoptosis/200 x/NE-1 200-3 4.jpg
- NE group-Ileal TUNEL apoptosis/200 x/NE-1 200-4.jpg
- NE group-Ileal TUNEL apoptosis/200 x/NE-2  200-1.jpg
- NE group-Ileal TUNEL apoptosis/200 x/NE-2 200-1 2.jpg
- NE group-Ileal TUNEL apoptosis/200 x/NE-2 200-2.jpg
- NE group-Ileal TUNEL apoptosis/200 x/NE-2 200-3 4.jpg
- NE group-Ileal TUNEL apoptosis/200 x/NE-2 200-3.jpg
- NE group-Ileal TUNEL apoptosis/200 x/NE-2 200-4.jpg
- NE group-Ileal TUNEL apoptosis/200 x/NE-2 200-5 6.jpg
- NE group-Ileal TUNEL apoptosis/200 x/NE-2 200-5.jpg
- NE group-Ileal TUNEL apoptosis/200 x/NE-2 200-6.jpg
- NE group-Ileal TUNEL apoptosis/400 x/
- NE group-Ileal TUNEL apoptosis/400 x/NE-1  400-1 2.jpg
- NE group-Ileal TUNEL apoptosis/400 x/NE-1  400-1.jpg
- NE group-Ileal TUNEL apoptosis/400 x/NE-1  400-2.jpg
- NE group-Ileal TUNEL apoptosis/400 x/NE-1  400-3 4.jpg
- NE group-Ileal TUNEL apoptosis/400 x/NE-1  400-3.jpg
- NE group-Ileal TUNEL apoptosis/400 x/NE-1  400-4.jpg
- NE group-Ileal TUNEL apoptosis/400 x/NE-1  400-5 6.jpg
- NE group-Ileal TUNEL apoptosis/400 x/NE-1  400-6.jpg
- NE group-Ileal TUNEL apoptosis/400 x/NE-1 400-5.jpg
- NE group-Ileal TUNEL apoptosis/400 x/NE-2  400-1 2.jpg
- NE group-Ileal TUNEL apoptosis/400 x/NE-2 400-1.jpg
- NE group-Ileal TUNEL apoptosis/400 x/NE-2 400-2.jpg
- NE group-Ileal TUNEL apoptosis/400 x/NE-2 400-3 4.jpg
- NE group-Ileal TUNEL apoptosis/400 x/NE-2 400-3.jpg
- NE group-Ileal TUNEL apoptosis/400 x/NE-2 400-4.jpg
- NE group-Ileal TUNEL apoptosis/400 x/NE-2 400-5 6.jpg
- NE group-Ileal TUNEL apoptosis/400 x/NE-2 400-5.jpg
- NE group-Ileal TUNEL apoptosis/400 x/NE-2 400-6.jpg
